# Supplementary material for: Coordinated Activation of Toll-Like Receptor8 (TLR8) and NLRP3 by the TLR8 Agonist, VTX-2337, Ignites Tumoricidal Natural Killer Cell Activity
Source: PubMed Central journal article supplement (PMC4771163; doi:10.1371/journal.pone.0148764), 2016-02-29
Supplement: pone.0148764.s002.pdf [file pone.0148764.s002.pdf]

# S1 Fig.

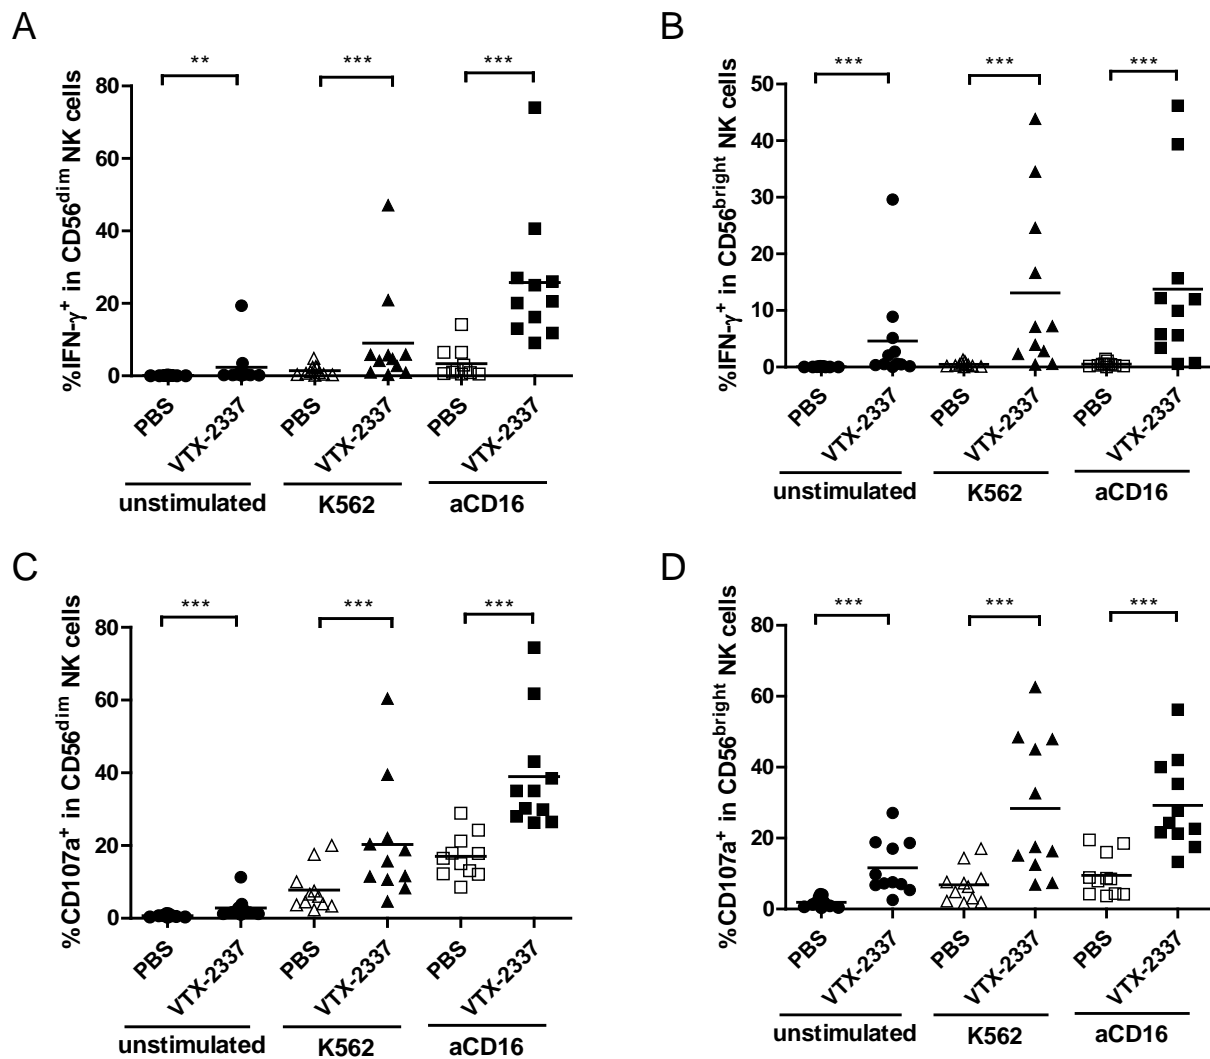

**S1 Fig.** VTX-2337-induced activation of CD56<sup>dim</sup> and CD56<sup>bright</sup> NK cells (A) The expression of IFN- $\gamma$  in CD56<sup>dim</sup> NK cells; (B) The expression of IFN- $\gamma$  in CD56<sup>bright</sup> NK cells; (C) The expression of CD107a in CD56<sup>dim</sup> NK cells; (D) The expression of CD107a in CD56<sup>bright</sup> NK cells. Each data point represents an individual donor (n= 11 donors). The horizontal bar represents group average. Each donor was analyzed in an independent experiment. \*\*,  $p < 0.01$ , \*\*\*,  $p < 0.001$  by Wilcoxon signed-rank test.
